# Supplementary material
Source: publisher figshare collection journal article supplement (https://sage.figshare.com/ndownloader/files/18667112)
Supplement: Supplementary file 1 [file 18667112]

## **Parents' discourse on English for young learners**

### **Interview questions**

#### **Questions for parents**

1: Personal and general details:

Age, occupation, years living in Israel (and in the neighborhood), number of children in the family, languages spoken at home, religion.

General comment: All interviewees were asked to elaborate and expand on their answers using prompts such as why, explain, give examples, please be specific, what do you mean, and more.

2: Did you learn English as a child? Do you speak English?

3: What is your opinion of learning English at an early age? They have now introduced English lessons in first and second grade. What do you think about it?

4: In your opinion, why do you think English is introduced in early grades?

5: Do you think parents have any influence in the school, on what the school decides? Do principals listen to parents' wishes?

6: Is English important you? Are you willing to invest in English for your children? How? What kind of investment?

7: Do you think there is a connection between English, knowing English and other things in life?

8: Is there anything you want to add or say about English, learning English related to yourself, the children or generally?

#### **Questions for teachers and principal**

1: What is your opinion of learning English at an early age? English is now introduced in first and second grade. What do you think about it?

2: Why do you think this is happening?

3: What are the pros and cons for teaching and learning English at this stage?

4: Do you think parents have any influence in the school, on what the school decides? Do principals listen to parents' wishes?
